# Supplementary material for: Pentamers Not Found in the Universal Proteome Can Enhance Antigen Specific Immune Responses and Adjuvant Vaccines
Source: PubMed Central journal article supplement (PMC3427150; doi:10.1371/journal.pone.0043802), 2012-08-24
Supplement: pone.0043802.s003.pdf [file pone.0043802.s003.pdf]

**Table S1: 5mers, 9mers, and 13mers evaluated**

| Name  | Sequence | Hydrophobicity | Organism†                                                                                                                                                                                                                                                                                                                                                                                                                                                                                                                                                                                                                                                                                                                                                                                                                                                                                                                                                                    |
|-------|----------|----------------|------------------------------------------------------------------------------------------------------------------------------------------------------------------------------------------------------------------------------------------------------------------------------------------------------------------------------------------------------------------------------------------------------------------------------------------------------------------------------------------------------------------------------------------------------------------------------------------------------------------------------------------------------------------------------------------------------------------------------------------------------------------------------------------------------------------------------------------------------------------------------------------------------------------------------------------------------------------------------|
| 5mer1 | CHKWD    | 20%            | <p><b><u>Eukarya</u></b><br/> <b>Fungi:</b><br/> <i>Puccinia graminis</i> (1-phosphatidylinositol-3-phosphate 5-kinase)<br/> <i>Naumovozya dairenensis</i> (hypothetical protein)<br/> <b>Plantae:</b><br/> <i>Melampsora larici-populina</i> (hypothetical protein)<br/> <i>Brachyscome latisquamea</i> (maturase)<br/> <i>Brachyscome ciliocarpa</i> (maturase)<br/> <b>Animalia:</b> <i>Amphimedon queenslandica</i> (hypothetical protein)<br/> <b>Bacteria</b><br/> <i>Opitutaceae bacterium</i> (hypothetical protein)<br/> <i>Peptostreptococcus anaerobius</i> (transcriptional regulatory, LytR family)<br/> <i>Denitrovibrio acetiphilus</i> (hypothetical protein)<br/> <b>Archaea</b><br/> <i>Nitrosopumilus maritimus</i> (hypothetical protein)<br/> <i>Ramlibacter tataouinensis</i> (hypothetical protein)<br/> <i>Candidatus Nitrosoarchaeum limnia</i> (phospho-2-dehydro-3-deoxyheptonate aldolase)</p>                                                   |
| 5mer2 | WHKCE    | 20%            | <p><b><u>Eukarya</u></b><br/> <b>Fungi:</b> <i>Pyrenophora tritici-repentis</i> (predicted protein)<br/> <i>Metarhizium anisopliae</i> (hypothetical protein)<br/> <b>Chromalveolata:</b> <i>Blastocystis hominis</i> (unnamed protein product)<br/> <b>Animalia:</b> <i>Nematostella vectensis</i> (predicted protein)<br/> <i>Ornithorhynchus anatinus</i> (Platypus, hypothetical protein)<br/> <i>Drosophila yakuba</i> (GE10666)<br/> <b>Plantae:</b> <i>Gluconacetobacter diazotrophicus</i> (hypothetical protein)<br/> <i>Populus trichocarpa</i> (predicted protein)<br/> <b>Unranked:</b> <i>Monosiga brevicollis</i> (hypothetical protein)<br/> <b>Bacteria</b><br/> <i>Gluconacetobacter diazotrophicus</i> (Superfamily I DNA and RNA helicase and helicase subunits-like protein)<br/> <i>Agrobacterium tumefaciens</i> (acetyltransferase)<br/> <i>Capnocytophaga</i> sp (hypothetical protein)<br/> <i>Clostridium hathewayi</i> (hypothetical protein)</p> |
| 5mer3 | CKWRC    | 20%            | <p><b><u>Eukarya</u></b><br/> <i>Sporisorium reilianum</i> (related to high-affinity nickel transport protein nic1)<br/> <i>Pyrenophora tritici-repentis</i> (hypothetical protein)<br/> <i>Neurospora tetrasperma</i> (hypothetical protein)<br/> <b>Animalia:</b> <i>Ciona intestinalis</i> (predicted similar to Sodium channel protein type 5 subunit alpha)<br/> <i>Brugia malayi</i> (Ubiquitin carboxyl-terminal hydrolase family protein)<br/> <i>Loa loa</i> (hypothetical protein)<br/> <i>Caenorhabditis remanei</i> (hypothetical protein)<br/> <i>Osmerus mordax</i> (Centaurin-alpha 2)<br/> <i>Sabellaria alveolata</i> (fructose-bisphosphate aldolase)</p>                                                                                                                                                                                                                                                                                                  |

|        |               |     |                                                                                                                                                                                                                                                                                                                                                                                                                                                                                                                                                                                                                                                                                                                                                                                                                                                                                                                                                                                                                                                                                                                                                                                                                                                                |
|--------|---------------|-----|----------------------------------------------------------------------------------------------------------------------------------------------------------------------------------------------------------------------------------------------------------------------------------------------------------------------------------------------------------------------------------------------------------------------------------------------------------------------------------------------------------------------------------------------------------------------------------------------------------------------------------------------------------------------------------------------------------------------------------------------------------------------------------------------------------------------------------------------------------------------------------------------------------------------------------------------------------------------------------------------------------------------------------------------------------------------------------------------------------------------------------------------------------------------------------------------------------------------------------------------------------------|
|        |               |     | <i>Limnodrilus</i> sp (fructose-bisphosphate aldolase)                                                                                                                                                                                                                                                                                                                                                                                                                                                                                                                                                                                                                                                                                                                                                                                                                                                                                                                                                                                                                                                                                                                                                                                                         |
| 5mer3  |               |     | <b>Plantae:</b> <i>Vitis vinifera</i> (hypothetical protein)<br><i>Selaginella moellendorffii</i> (hypothetical protein)<br><i>Physcomitrella patens subsp. patens</i> (predicted protein)<br><i>Volvox carteri</i> f. <i>nagariensis</i> (hypothetical protein)<br><b>Bacteria</b><br><i>Neisseria bacilliformis</i> (hypothetical protein)                                                                                                                                                                                                                                                                                                                                                                                                                                                                                                                                                                                                                                                                                                                                                                                                                                                                                                                   |
| 5mer4  | KWCEC         | 20% | <b>Eukarya</b><br><b>Excavata:</b> <i>Leishmania mexicana</i> (hypothetical protein)<br><b>Chromalveolata:</b> <i>Cryptosporidium muris</i> (hypothetical protein)<br><b>Plantae :</b> <i>Physcomitrella patens subsp. patens</i> , <i>Populus trichocarpa</i> (conserved hypothetical protein)<br><b>Bacteria</b><br><i>Bathycoccus</i> sp., <i>Paenibacillus curdlanolyticus</i> , <i>Clostridium nexile</i> , <i>Clostridium ljungdahlii</i> , <i>Bacteroides pectinophilus</i> , <i>Rhodococcus erythropolis</i> , <i>Veillonella</i> sp., <i>Ahrensia</i> sp. (conserved hypothetical protein)<br><i>Atopobium rima</i> e (methyltransferase)                                                                                                                                                                                                                                                                                                                                                                                                                                                                                                                                                                                                             |
| 5mer5  | DCWMD         | 40% | <b>Eukarya</b><br><b>Chromalveolata:</b> <i>Emiliana huxleyi</i> (ankyrin-1-like protein)<br><b>Fungi:</b> <i>Candida tenuis</i> (hypothetical protein)<br><i>Ajellomyces</i> sp. (C6 transcription factor)<br><i>Paracoccidioides brasiliensis</i> (hypothetical protein)<br><i>Trichophyton</i> sp. (C6 transcription factor)<br><i>Arthroderma</i> sp (C6 transcription factor)<br><b>Animalia:</b> <i>Pediculus humanus corporis</i> (hypothetical protein)<br><i>Daphnia pulex</i> (hypothetical protein)<br><i>Taeniopygia guttata</i> (hypothetical protein)<br><b>Plantae:</b> <i>Chlorella variabilis</i> (hypothetical protein)<br><b>Bacteria</b><br><i>Asticcacaulis biprosthecum</i> (pectinesterase family protein)<br><i>Bacteroides</i> sp. (Glycoside hydrolase)<br><i>Clostridium</i> sp (hypothetical protein)<br><i>Bacillus megaterium</i> (allantoate amidohydrolase)<br><i>Parvibaculum lavamentivorans</i> (beta-lactamase-like protein)<br><i>Agrobacterium</i> sp. (competence protein F)<br><i>Campylobacter gracilis</i> (hypothetical protein)<br><i>Bordetella petrii</i> (glutathione S-transferase)<br><b>Virus</b><br>Duck reovirus GZ/CHN/2007 (S3 protein)<br>Grapevine leafroll-associated virus 7 (heat shock protein 70) |
| 5mer6  | KYMCW         | 60% | <b>Eukarya</b><br><i>Ciona intestinalis</i> (hypothetical protein)<br><b>Bacteria</b><br><i>Desulfobacterium</i> sp. (hypothetical protein)                                                                                                                                                                                                                                                                                                                                                                                                                                                                                                                                                                                                                                                                                                                                                                                                                                                                                                                                                                                                                                                                                                                    |
| 9mer1  | CWKCWCMFE     | 44% | Not found in any proteome                                                                                                                                                                                                                                                                                                                                                                                                                                                                                                                                                                                                                                                                                                                                                                                                                                                                                                                                                                                                                                                                                                                                                                                                                                      |
| 9mer3  | WNWCMHWDC     | 44% | Not found in any proteome                                                                                                                                                                                                                                                                                                                                                                                                                                                                                                                                                                                                                                                                                                                                                                                                                                                                                                                                                                                                                                                                                                                                                                                                                                      |
| 9mer4  | WHWCMMCWDC    | 56% | Not found in any proteome                                                                                                                                                                                                                                                                                                                                                                                                                                                                                                                                                                                                                                                                                                                                                                                                                                                                                                                                                                                                                                                                                                                                                                                                                                      |
| 13mer1 | HEHWCMWHCCMI  | 46% | Not found in any proteome                                                                                                                                                                                                                                                                                                                                                                                                                                                                                                                                                                                                                                                                                                                                                                                                                                                                                                                                                                                                                                                                                                                                                                                                                                      |
| 13mer3 | HMMCHWMCWCDMH | 46% | Not found in any proteome                                                                                                                                                                                                                                                                                                                                                                                                                                                                                                                                                                                                                                                                                                                                                                                                                                                                                                                                                                                                                                                                                                                                                                                                                                      |
| 13mer4 | CHMMCHWMWCCMD | 46% | Not found in any proteome                                                                                                                                                                                                                                                                                                                                                                                                                                                                                                                                                                                                                                                                                                                                                                                                                                                                                                                                                                                                                                                                                                                                                                                                                                      |
